# Supplementary material
Source: Springer Nature journal article supplement (https://www.springermedizin.de/resource/supplementary/12986_2005_88_MOESM5_ESM.pdf/25655340)
Supplement: MOESM5 [file 25655340]

**A**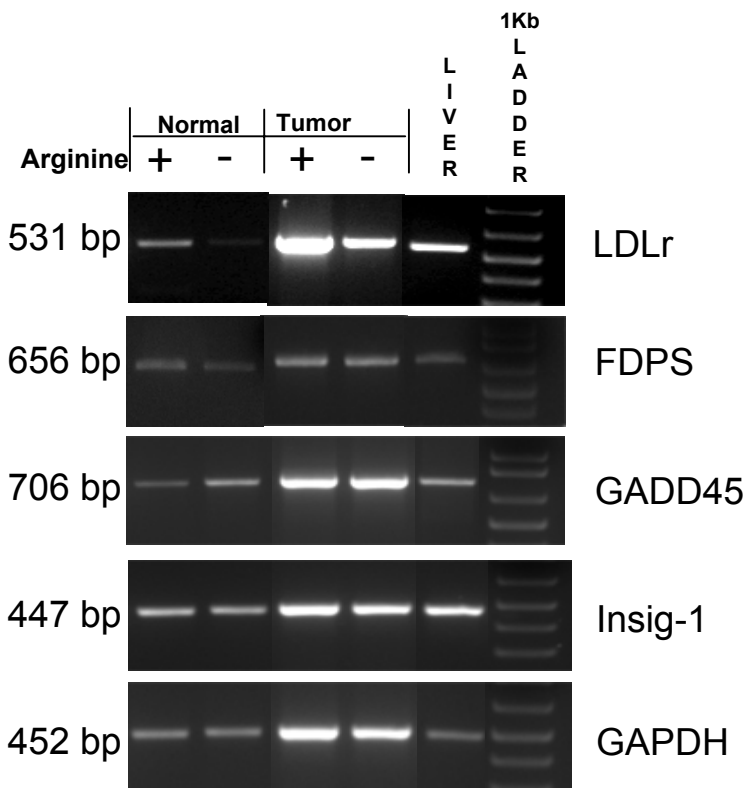**B****Genes Normalized to GAPDH**

|             | LDLR | FDPS | GADD45 | INSIG |
|-------------|------|------|--------|-------|
| Normal+Arg  | 1.29 | 0.77 | 0.43   | 1.36  |
| Normal -Arg | 0.14 | 0.15 | 0.97   | 1.20  |
| Tumor+Arg   | 1.83 | 0.31 | 0.87   | 0.89  |
| Tumor -Arg  | 0.97 | 0.34 | 1.10   | 0.92  |
| Liver       | 2.84 | 0.63 | 1.29   | 2.71  |
